# Supplementary material for: Characterization of Biomarkers in Colorectal Cancer Liver Metastases as a Prognostic Tool
Source: MDPI journal article supplement (doi:10.3390/jpm11111059), 2021-10-21
Supplement: s1 [file s1]

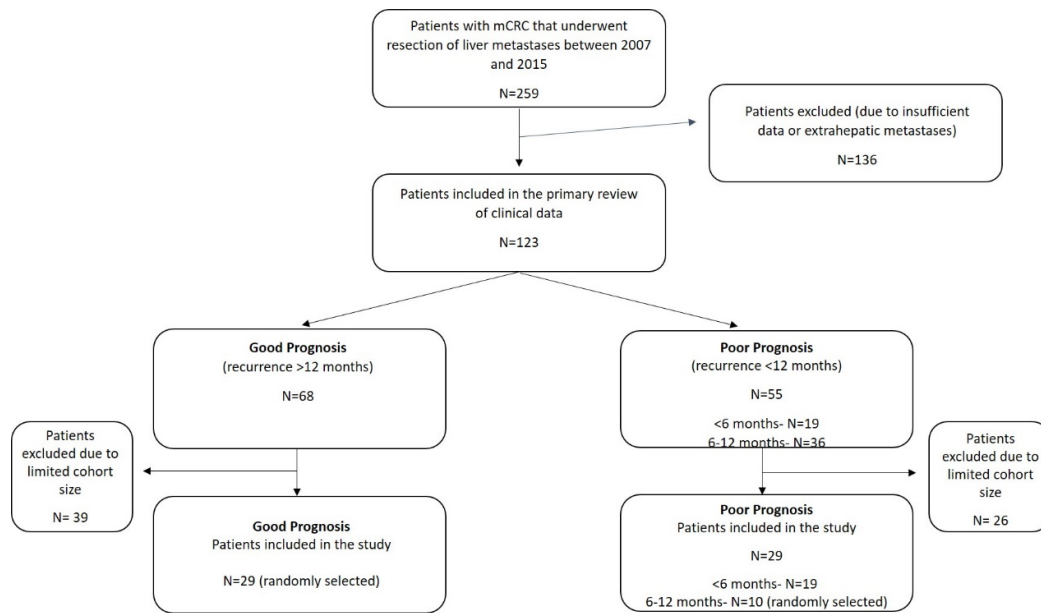

**Supplementary Figure S1:** Patients inclusion flow-chart.

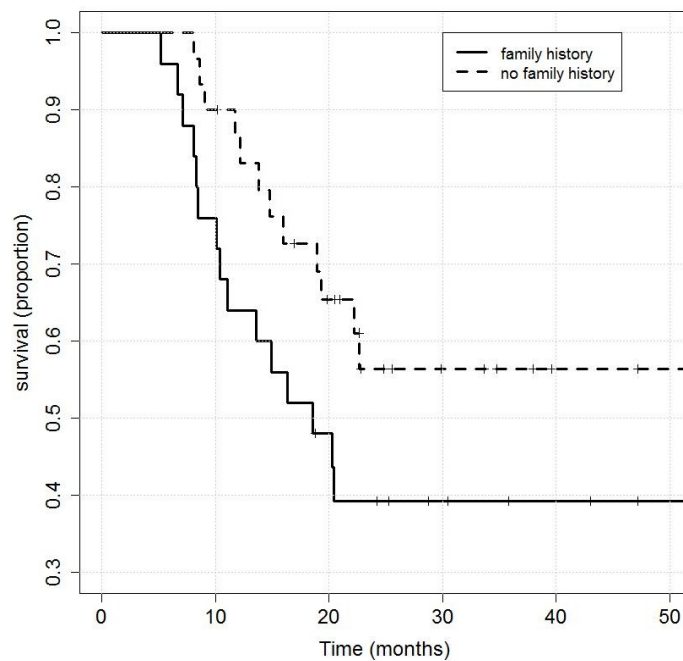

**Supplementary Figure S2:** KM Survival Curve according to patient's family history – Hazard ratio for disease recurrence within 1 year from surgery in patients without family history was 0.3 [CI: (0.11,0.78), P=0.0144].

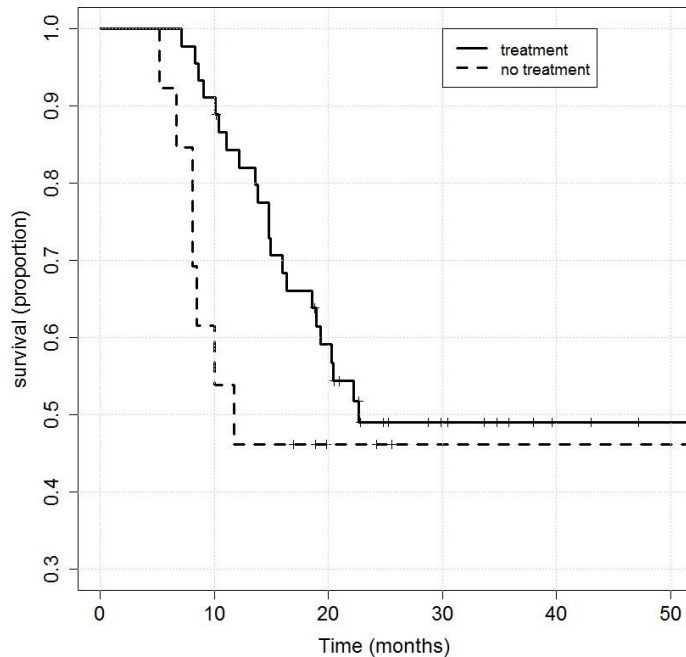

**Supplementary Figure S3:** KM Survival Curve according to neoadjuvant treatment – The hazard ratio for disease recurrence within 1 year from surgery in patients who did not receive neoadjuvant chemotherapy was 3.83 [CI: (1.12,13.06), P=0.032]. Treatment – Received neoadjuvant treatment. No treatment – Did not receive neoadjuvant treatment.

**Supplementary Table S1:** List of assessed prognostic factors.

|                                                       | Good Prognosis      | Poor Prognosis      | P-value       |
|-------------------------------------------------------|---------------------|---------------------|---------------|
| Gender (M / F)                                        | 48% / 52%           | 62% / 38%           | NS            |
| Ethnicity (Ashkenazi Jew, Sephardic Jew, Arab, UNK)   | 59% / 31% / 7% / 3% | 55% / 38% / 3% / 3% | NS            |
| Smoking (Yes / No)                                    | 21% / 79%           | 38% / 62%           | NS            |
| Alcohol (Yes / No / UNK)                              | 34% / 66%           | 10% / 86% / 3%      | NS            |
| Diabetes mellitus (Yes / No)                          | 34% / 62% / 3%      | 28% / 72%           | NS            |
| Other Malignancy (Yes / No)                           | 7% / 93%            | 14% / 86%           | NS            |
| Family History of Malignancies (Yes / No / UNK)       | 35% / 62% / 3%      | 52% / 41% / 7%      | <b>0.0144</b> |
| Primary Tumor Location (Right / Left)                 | 34% / 66%           | 31% / 69%           | NS            |
| LVI (Yes / No / UNK)                                  | 34.5% / 34.5% / 32% | 17% / 28% / 55%     | NS            |
| KRAS (WT / Mut / UNK)                                 | 31% / 21% / 48%     | 21% / 24% / 55%     | NS            |
| Synchronous / Metachronous disease                    | 76% / 24%           | 52% / 48%           | NS            |
| Time for metachronous disease appearance (mean month) | 32.3                | 27.2                | NS            |
| Median number of livers mets at dg. (Range)           | 1 (1-4)             | 1 (1-6)             | NS            |
| Median size of larger metastases (Range)              | 23.5 (10-120) mm    | 29 (8-160) mm       | NS            |

M – Male / F – Female / UNK – Unknown / LVI - Lymphovascular invasion / WT – Wild type / Mut – mutated / dg. – Diagnosis / NS – Not significant

**Supplementary Table S2:** List of significantly expressed proteins.

| Protein IDs                                            | Protein names                                                                                                                      | Gene names                   | ratio (bad vs. good) | FDR adjusted p-value |
|--------------------------------------------------------|------------------------------------------------------------------------------------------------------------------------------------|------------------------------|----------------------|----------------------|
| P10916;<br>G3V1V8;<br>Q9BUA6                           | Myosin regulatory light chain 2, ventricular/<br>cardiac muscle isoform                                                            | MYL2                         | 1.128218241          | 0                    |
| O43312;<br>H0YB53;<br>E7EWW5                           | Metastasis suppressor protein 1                                                                                                    | MTSS1                        | 1.113171114          | 0                    |
| E9PNM1;<br>A0A1W2PQ47;<br>P37268;<br>E9PJG4;<br>E9PS69 | Squalene synthase                                                                                                                  | FDFT1                        | 1.083580676          | 3.10139E-11          |
| P13164;<br>H7BYV1;<br>E9PS44;<br>Q01629;<br>Q01628     | Interferon-induced transmembrane protein 1; Interferon-induced transmembrane protein 2; Interferon-induced transmembrane protein 3 | IFITM1;<br>IFITM2;<br>IFITM3 | 1.069733709          | 8.89965E-08          |
| O75610;<br>A0A087WW09                                  | Left-right determination factor 1                                                                                                  | LEFTY1                       | 1.068475813          | 1.70436E-07          |
| Q9BUD6;<br>D6RB12;<br>D6RBY3;<br>D6RIH5                | Spondin-2                                                                                                                          | SPON2                        | 1.065922124          | 5.88491E-07          |
| P55060                                                 | Exportin-2                                                                                                                         | CSE1L                        | 1.059279627          | 1.37978E-05          |
| P18065;<br>C9JMY1;<br>C9JW52                           | Insulin-like growth factor-binding protein 2                                                                                       | IGFBP2                       | 1.055637501          | 7.53186E-05          |
| E9PHA6;<br>P43246                                      | DNA mismatch repair protein Msh2                                                                                                   | MSH2                         | 1.054964008          | 9.96408E-05          |
| Q96FX7;<br>H0Y2Q1                                      | tRNA (adenine(58)-N(1))-methyltransferase catalytic subunit TRMT61A                                                                | TRMT61A                      | 1.053128278          | 0.000202645          |
| A0A075B6K4;<br>P01715                                  |                                                                                                                                    | IGLV3-10                     | 1.052885287          | 0.00021921           |
| Q6UWY5;                                                | Olfactomedin-like                                                                                                                  | OLFML1                       | 1.052486124          | 0.00025455           |

| Protein IDs                                                                                                   | Protein names                                                                                                                                    | Gene names                  | ratio (bad vs. good) | FDR adjusted p-value |
|---------------------------------------------------------------------------------------------------------------|--------------------------------------------------------------------------------------------------------------------------------------------------|-----------------------------|----------------------|----------------------|
| E9PN44                                                                                                        | protein 1                                                                                                                                        |                             |                      |                      |
| P33991;<br>E5RG31                                                                                             | DNA replication<br>licensing factor MCM4                                                                                                         | MCM4                        | 1.051558334          | 0.000343541          |
| Q6PIP6;<br>K7EL65;<br>K7ELF8;<br>O14732                                                                       | Inositol<br>monophosphatase 2                                                                                                                    | IMPA2                       | 1.050875085          | 0.000451896          |
| P10645;<br>G5E968                                                                                             | Chromogranin-A;<br>Vasostatin-1;<br>Vasostatin-2; EA-92;<br>ES-43; Pancreastatin;<br>SS-18; WA-8; WE-14;<br>LF-19; AL-11; GV-19;<br>GR-44; ER-37 | CHGA                        | 1.050303356          | 0.00056478           |
| P07451                                                                                                        | Carbonic anhydrase 3                                                                                                                             | CA3                         | 1.047856586          | 0.001412062          |
| P15559;<br>B4DLR8;<br>H3BNV2                                                                                  | NAD(P)H<br>dehydrogenase<br>[quinone] 1                                                                                                          | NQO1                        | 1.047248185          | 0.001774045          |
| P53367                                                                                                        | Arfaptin-1                                                                                                                                       | ARFIP1                      | 1.045638609          | 0.003322397          |
| P53814;<br>A0A087WVP4;<br>A0A087X1R1;A<br>0A096LNK9;H7<br>BZZ8;B5MCI0;C<br>9JGQ0;C9JP19;<br>H7C372;C9JQZ<br>8 | Smoothelin                                                                                                                                       | SMTN                        | 1.045336474          | 0.003665062          |
| P09237                                                                                                        | Matrilysin                                                                                                                                       | MMP7                        | 1.043704769          | 0.006367446          |
| A0A0J9YY99;<br>P0DP03;<br>P01768;<br>P01764                                                                   | Ig heavy chain V-III<br>region CAM; Ig heavy<br>chain V-III region VH26                                                                          |                             | 1.043588544          | 0.006528347          |
| Q9UBY9;<br>Q68DG0;<br>D3YTC6;<br>Q8N241;<br>C9J5A3                                                            | Heat shock protein<br>beta-7                                                                                                                     | HSPB7;<br>DKFZp779<br>D0968 | 1.043272005          | 0.007224123          |
| P16444;<br>H3BQS5;<br>H3BP43                                                                                  | Dipeptidase 1                                                                                                                                    | DPEP1                       | 1.042516677          | 0.009082335          |
| C9J0J7;<br>G5E9Q6                                                                                             | Profilin                                                                                                                                         | PFN2                        | 1.042114052          | 0.010057357          |
| P22087;<br>M0R0P1;                                                                                            | rRNA 2-O-<br>methyltransferase                                                                                                                   | FBL                         | 1.041819482          | 0.010973843          |

| Protein IDs                                                                                                | Protein names                                | Gene names | ratio (bad vs. good) | FDR adjusted p-value |
|------------------------------------------------------------------------------------------------------------|----------------------------------------------|------------|----------------------|----------------------|
| M0R299;<br>M0QXL5;<br>M0R2Q4;<br>M0R2U2;<br>M0R1H0;<br>M0R2B0                                              | fibrillarin                                  |            |                      |                      |
| Q9H0A0;<br>A0A087WV29;<br>E9PMU0;<br>E9PJN6                                                                | N-acetyltransferase 10                       | NAT10      | 1.041648076          | 0.011494623          |
| P78539                                                                                                     | Sushi repeat-containing protein SRPX         | SRPX       | 1.041432939          | 0.012234208          |
| Q9NX24;<br>D6RC52;<br>D6RCB9;<br>H0YC83;<br>J3QSY4                                                         | H/ACA ribonucleoprotein complex subunit 2    | NHP2       | 1.040990853          | 0.014135042          |
| H3BRU4;<br>F8W8F7;<br>Q86Y34                                                                               | Probable G-protein coupled receptor 97       | GPR97      | 1.040362623          | 0.017163009          |
| Q8NFH5;<br>C9IYQ7;<br>F8WCF5;<br>F8WEL4;<br>C9JIY9;<br>C9JWU7                                              | Nucleoporin NUP53                            | NUP35      | 1.040244324          | 0.017366493          |
| Q9H7D7;<br>H0Y9R3;<br>H0Y917                                                                               | WD repeat-containing protein 26              | WDR26      | 1.03993936           | 0.019062689          |
| H3BQV3;<br>Q96MW5                                                                                          | Conserved oligomeric Golgi complex subunit 8 | COG8       | 1.039680004          | 0.019724425          |
| E7EQ12;<br>D6RAA8;<br>D6RC54                                                                               |                                              | CAST       | 1.038565883          | 0.025841849          |
| F5H8H2;<br>Q03426;<br>A0A1B0GWC2;<br>F5GXC0;<br>F5H092;<br>F5H163;<br>F5H368;<br>A0A1W2PS16;<br>A0A1B0GWF3 | Mevalonate kinase                            | MVK        | 1.038083204          | 0.02972975           |
| Q8IV56;                                                                                                    | Proline-rich protein 15                      | PRR15      | 1.038075161          | 0.02972975           |

| Protein IDs                                                                         | Protein names                                                       | Gene names             | ratio (bad vs. good) | FDR adjusted p-value |
|-------------------------------------------------------------------------------------|---------------------------------------------------------------------|------------------------|----------------------|----------------------|
| C9JQ22                                                                              |                                                                     |                        |                      |                      |
| Q5HYK7                                                                              | SH3 domain-containing protein 19                                    | SH3D19                 | 1.037921831          | 0.030596028          |
| Q9UKX2;<br>P13535;<br>P12882;<br>Q9UKX3;<br>E7EX84                                  | Myosin-2; Myosin-8;<br>Myosin-1                                     | MYH2;<br>MYH8;<br>MYH1 | 1.037659767          | 0.033025822          |
| O75323;<br>C9K068;<br>C9J7B1;<br>H7C333;<br>F8WBI5                                  | Protein NipSnap homolog 2                                           | GBAS                   | 1.037537186          | 0.034013629          |
| O00763;<br>F8W8T8;<br>H0YGH5;<br>F5H5C3                                             | Acetyl-CoA carboxylase 2; Biotin carboxylase                        | ACACB                  | 1.036849768          | 0.040399464          |
| Q93099;<br>C9JTX9;<br>H7C576;<br>H7C4R8;<br>H7C5G7                                  | Homogentisate 1,2-dioxygenase                                       | HGD                    | 0.969651026          | 0.049373254          |
| Q9NZP8;<br>H0YFL7;<br>F5H2Z5;<br>F5GWF3                                             | Complement C1r subcomponent-like protein                            | C1RL                   | 0.969486323          | 0.047120402          |
| Q8WU76                                                                              | Sec1 family domain-containing protein 2                             | SCFD2                  | 0.969459131          | 0.047120402          |
| P45954                                                                              | Short/branched chain specific acyl-CoA dehydrogenase, mitochondrial | ACADSB                 | 0.969389093          | 0.046508708          |
| Q8N5Z0;<br>D6RC56;<br>D6RFY7;<br>D6REB9                                             | Kynurenine/alpha-amino adipate aminotransferase, mitochondrial      | AADAT                  | 0.969207864          | 0.044127359          |
| P04350;<br>M0QY85;<br>M0R0X0;<br>M0QY37;<br>M0QX14;<br>M0R278;<br>M0QZL7;<br>M0R1I1 | Tubulin beta-4A chain                                               | TUBB4A                 | 0.969198619          | 0.044127359          |

| Protein IDs                                                                                                                                                                                                                                                                     | Protein names                                          | Gene names       | ratio (bad vs. good) | FDR adjusted p-value |
|---------------------------------------------------------------------------------------------------------------------------------------------------------------------------------------------------------------------------------------------------------------------------------|--------------------------------------------------------|------------------|----------------------|----------------------|
| Q38LG0;<br>P10635;<br>E7ENE7;<br>A0A0G2JSD7;<br>C1ID54;<br>A0A0G2JLK7;<br>A0A1B0GU72;<br>Q6NWU0;<br>A0A1B0GV74;<br>A0A0U1RRC6;<br>A0A0U1RQD0;<br>A0A0G2JNM9;<br>A0A0G2JLV4;<br>A0A0G2JMD2;<br>A0A087X1C5;<br>H7BY38;<br>A0A0G2JN61;<br>A0A087WXN8;<br>A0A1B0GUD8;<br>A0A1B0GTQ1 | Cytochrome P450 2D6                                    | CYP2D6           | 0.968935725          | 0.040981207          |
| O75264;<br>K7EKM7                                                                                                                                                                                                                                                               | Small integral membrane protein 24                     | SMIM24           | 0.968820069          | 0.040211779          |
| A0A0A0MR14;<br>A0A0A0MRF2;<br>A0A087X1R2;<br>A0A087X0P3;<br>A0A087WV17;<br>A0A0G2JMM7;<br>Q8IYS5                                                                                                                                                                                | Osteoclast-associated immunoglobulin-like receptor     | OSCAR            | 0.968598077          | 0.037590056          |
| E9BPP6;<br>P55157;<br>D6REL9                                                                                                                                                                                                                                                    | Microsomal triglyceride transfer protein large subunit | MTTP             | 0.968371342          | 0.035067483          |
| P04921;<br>A0A0J9YYA0;<br>A0A0J9YWG3;<br>B7Z1Y6;<br>A0A1W2PQF4;<br>Q9UHC6                                                                                                                                                                                                       | Glycophorin-C; Contactin-associated protein-like 2     | GYPC;<br>CNTNAP2 | 0.968262166          | 0.034109233          |
| K7EJ28;<br>Q2QBA2;<br>A0A0A6YY99;<br>O75888;<br>C9JFN2; C9JF68                                                                                                                                                                                                                  | Tumor necrosis factor ligand superfamily member 13     | TNFSF13          | 0.967751619          | 0.02972975           |
| P31025;<br>Q5VSP4                                                                                                                                                                                                                                                               | Lipocalin-1; Putative lipocalin 1-like protein         | LCN1;<br>LCN1P1  | 0.967268144          | 0.025841849          |

| Protein IDs                                                   | Protein names                                           | Gene names | ratio (bad vs. good) | FDR adjusted p-value |
|---------------------------------------------------------------|---------------------------------------------------------|------------|----------------------|----------------------|
|                                                               | 1                                                       |            |                      |                      |
| P37059;<br>H3BS44;<br>H3BRZ6;<br>H3BNN1;<br>H3BQY3            | Estradiol 17-beta-dehydrogenase 2                       | HSD17B2    | 0.967117173          | 0.025063431          |
| P23946                                                        | Chymase                                                 | CMA1       | 0.96692032           | 0.02360208           |
| P56192;<br>H0YHL6;<br>H0YI94;<br>H0YI27;<br>F5H2V6;<br>H0YIP0 | Methionine--tRNA ligase, cytoplasmic                    | MARS       | 0.966896742          | 0.02360208           |
| A0A0J9YX34;<br>Q9C040                                         | Tripartite motif-containing protein 2                   | TRIM2      | 0.966736108          | 0.022619886          |
| Q07075;<br>H0YA67                                             | Glutamyl aminopeptidase                                 | ENPEP      | 0.966513801          | 0.021094035          |
| Q9UF12                                                        | Probable proline dehydrogenase 2                        | PRODH2     | 0.966508503          | 0.021094035          |
| P04114;<br>A8MUN2;<br>CON_ENSEMBL<br>:<br>ENSBTAP00000032840  | Apolipoprotein B-100;<br>Apolipoprotein B-48            | APOB       | 0.966337166          | 0.020280491          |
| A0A087X226;<br>Q3KQV9                                         | UDP-N-acetylhexosamine pyrophosphorylase-like protein 1 | UAP1L1     | 0.966190495          | 0.019724425          |
| P06133;<br>A0A1W2PQJ2;<br>D6RGY0                              | UDP-glucuronosyltransferase 2B4                         | UGT2B4     | 0.966096097          | 0.019308861          |
| P22760;<br>C9K0E9                                             | Arylacetamide deacetylase                               | AADAC      | 0.9660631            | 0.019308861          |
| Q8IVS8;<br>A0A0C4DGA0;<br>C9JA32;<br>C9J3N5                   | Glycerate kinase                                        | GLYCTK     | 0.965656465          | 0.017320215          |
| P51161                                                        | Gastrotropin                                            | FABP6      | 0.965395383          | 0.016155447          |
| Q8WXC6                                                        | Myeloma-overexpressed gene 2 protein                    | MYEOV2     | 0.963981575          | 0.010057357          |



| Protein IDs                                                                  | Protein names                                                                                                    | Gene names | ratio (bad vs. good) | FDR adjusted p-value |
|------------------------------------------------------------------------------|------------------------------------------------------------------------------------------------------------------|------------|----------------------|----------------------|
| CON__Q9UE12;<br>CON__Q15323;<br>Q15323;<br>Q14532;<br>CON__Q14532;<br>G3V1C2 | Keratin, type I cuticular Ha1                                                                                    | KRT31      | 0.963847476          | 0.009865999          |
| Q9NR99                                                                       | Matrix-remodeling-associated protein 5                                                                           | MXRA5      | 0.963043841          | 0.007383715          |
| P55259;<br>I3L4Y3; I3L2Z7;<br>I3L486; I3L3I2                                 | Pancreatic secretory granule membrane major glycoprotein GP2                                                     | GP2        | 0.962950675          | 0.007238912          |
| Q9BYE9                                                                       | Cadherin-related family member 2                                                                                 | CDHR2      | 0.962331848          | 0.006054494          |
| Q7Z5P4                                                                       | 17-beta-hydroxysteroid dehydrogenase 13                                                                          | HSD17B13   | 0.961374324          | 0.004128494          |
| O15204                                                                       | ADAM DEC1                                                                                                        | ADAMDEC1   | 0.961327264          | 0.004128494          |
| P01031                                                                       | Complement C5; Complement C5 beta chain; Complement C5 alpha chain; C5a anaphylatoxin; Complement C5 alpha chain | C5         | 0.957990569          | 0.001051295          |
| Q9P2I0                                                                       | Cleavage and polyadenylation specificity factor subunit 2                                                        | CPSF2      | 0.957730146          | 0.000954475          |
| F5GZZ9;<br>C9JHR8;<br>Q86VB7                                                 | Scavenger receptor cysteine-rich type 1 protein M130; Soluble CD163                                              | CD163      | 0.957418202          | 0.000845924          |
| Q08397;<br>H3BUV8                                                            | Lysyl oxidase homolog 1                                                                                          | LOXL1      | 0.957389504          | 0.000845924          |
| O15488;<br>A0A1W2PQ75;<br>J3QSZ3                                             | Glycogenin-2                                                                                                     | GYG2       | 0.955117652          | 0.000321036          |
| P53582;<br>D6RF24                                                            | Methionine aminopeptidase 1                                                                                      | METAP1     | 0.95510266           | 0.000321036          |
| P39900                                                                       | Macrophage metalloelastase                                                                                       | MMP12      | 0.954669549          | 0.000272684          |
| Q92626;<br>H7C1W1;                                                           | Peroxidasin homolog                                                                                              | PXDN       | 0.953565247          | 0.00017794           |

| Protein IDs                                                                                            | Protein names                                                              | Gene names                 | ratio (bad vs. good) | FDR adjusted p-value |
|--------------------------------------------------------------------------------------------------------|----------------------------------------------------------------------------|----------------------------|----------------------|----------------------|
| H7C300; C9J4I9                                                                                         |                                                                            |                            |                      |                      |
| CON__P78386; P78386; F5GYI5                                                                            | Keratin, type II cuticular Hb5                                             | KRT85                      | 0.953290248          | 0.000160117          |
| O60218                                                                                                 | Aldo-keto reductase family 1 member B10                                    | AKR1B10                    | 0.952673546          | 0.000120956          |
| P23378; A0A1W2PP74; A0A1W2PPB1; A0A1W2PQV3; A0A1W2PPE1; A0A1W2PPK8; A0A1W2PQU6; A0A1W2PPH6; A0A1W2PPG0 | Glycine dehydrogenase (decarboxylating), mitochondrial                     | GLDC                       | 0.949066311          | 1.97473E-05          |
| CON__P02754                                                                                            |                                                                            |                            | 0.947845915          | 1.08456E-05          |
| P07357                                                                                                 | Complement component C8 alpha chain                                        | C8A                        | 0.945632919          | 3.15765E-06          |
| P04745; P19961; P04746; Q5T085; CON__Q3MHH8; H7BZQ8; C9J2Z5; Q5T084; C9JWK7                            | Alpha-amylase 1; Alpha-amylase 2B; Pancreatic alpha-amylase; Alpha-amylase | AMY1A; AMY2B; AMY2A; AMY1B | 0.945212236          | 2.57897E-06          |
| Q01523                                                                                                 | Defensin-5;HD5(23-94);HD5(29-94);HD5(56-94);HD5(63-94)                     | DEFA5                      | 0.944639327          | 1.92336E-06          |
| O43490                                                                                                 | Prominin-1                                                                 | PROM1                      | 0.944343592          | 1.6945E-06           |
| Q04826                                                                                                 | HLA class I histocompatibility antigen, B-40 alpha chain                   | HLA-B                      | 0.943866785          | 1.33979E-06          |
| O60240; H0YM16                                                                                         | Perilipin-1                                                                | PLIN1                      | 0.942433269          | 5.88491E-07          |
| D6RB89; P50120                                                                                         | Retinol-binding protein 2                                                  | RBP2                       | 0.940849049          | 2.43864E-07          |
| A0A0G2JR65; Q02817; A0A0G2JM87;                                                                        | Mucin-2                                                                    | MUC2                       | 0.938034965          | 4.80026E-08          |

| Protein IDs                            | Protein names                                                                                                                                                                               | Gene names | ratio (bad vs. good) | FDR adjusted p-value |
|----------------------------------------|---------------------------------------------------------------------------------------------------------------------------------------------------------------------------------------------|------------|----------------------|----------------------|
| Q9UMI9                                 |                                                                                                                                                                                             |            |                      |                      |
| P01275                                 | Glucagon; Glicentin; Glicentin-related polypeptide; Oxyntomodulin; Glucagon; Glucagon-like peptide 1; Glucagon-like peptide 1(7-37); Glucagon-like peptide 1(7-36); Glucagon-like peptide 2 | GCG        | 0.934562059          | 4.74045E-09          |
| P09488; E7EWW9; B9ZVX7; H3BQT3; H3BRM6 | Glutathione S-transferase Mu 1                                                                                                                                                              | GSTM1      | 0.931417253          | 5.27109E-10          |
| Q8NES3; A0A087X191                     | Beta-1,3-N-acetylglucosaminyltransferase lunatic fringe                                                                                                                                     | LFNG       | 0.931247289          | 5.15874E-10          |
| B7ZL91; Q16819                         | Metalloendopeptidase; Meprin A subunit alpha                                                                                                                                                | MEP1A      | 0.931140808          | 5.15874E-10          |
| Q6UX06                                 | Olfactomedin-4                                                                                                                                                                              | OLFM4      | 0.927737694          | 4.47084E-11          |
| A6NCN2                                 | Putative keratin-87 protein                                                                                                                                                                 | KRT87P     | 0.919241106          | 0                    |
| O43741                                 | 5-AMP-activated protein kinase subunit beta-2                                                                                                                                               | PRKAB2     | 0.918979831          | 0                    |
| CON__P02663                            |                                                                                                                                                                                             |            | 0.917388047          | 0                    |
